# Supplementary material for: Detection of recurrent alternative splicing switches in tumor samples reveals novel signatures of cancer
Source: Oxford University Press journal article supplement (doi:10.1093/nar/gku1392), 2015-01-10
Supplement: nar_43_3_1345_s1.zip [file nar_43_3_1345_s1.zip]

Archive with 5 entries (5 files):
- nar-02177-met-g-2014-File013.zip
- nar-02177-met-g-2014-File009.pdf
- nar-02177-met-g-2014-File012.zip
- nar-02177-met-g-2014-File010.zip
- nar-02177-met-g-2014-File011.zip
